# Supplementary material for: Substituent effect on fluorescence signaling of the cell permeable HSO4− receptors through single point to ratiometric response in green solvent
Source: Royal Society of Chemistry journal article supplement (doi:10.1039/c4ra03551h), 2014-01-01
Supplement: c4ra03551h1.pdf [file c4ra03551h1.pdf]

## *Supporting Information*

**For**

### **Substituent effect on fluorescence signalling of the HSO<sub>4</sub><sup>-</sup> receptors through single point to ratiometric response in green solvent<sup>†</sup>**

**Manjira Mukherjee,<sup>a</sup> Siddhartha Pal,<sup>a</sup> Buddhadeb Sen,<sup>a</sup> Somenath Lohar,<sup>a</sup> Samya Banerjee,<sup>b</sup> Snehasis Banerjee<sup>c</sup> and Pabitra Chattopadhyay<sup>a\*</sup>**

*Department of Chemistry, Burdwan University, Golapbag, Burdwan-713104, West Bengal, India*

*E-mail: pabitracc@yahoo.com*

## **CONTENTS**

1. **Fig. S1** <sup>1</sup>H NMR spectrum of **L<sub>1</sub>H** in DMSO-d<sub>6</sub>
2. **Fig. S2** <sup>1</sup>H NMR spectrum of **L<sub>2</sub>H** in DMSO-d<sub>6</sub>
3. **Fig. S3** Mass spectrum of **L<sub>1</sub>H**
4. **Fig. S4** Mass spectrum of **L<sub>2</sub>H**
5. **Fig. S5** IR spectrum of **L<sub>1</sub>H**
6. **Fig. S6** IR spectrum of **L<sub>2</sub>H**
7. **Fig. S7** <sup>1</sup>H NMR spectrum of **K[L<sub>1</sub>H-HSO<sub>4</sub>]**
8. **Fig. S8** <sup>1</sup>H NMR spectrum of **K[L<sub>2</sub>H-HSO<sub>4</sub>]**
9. **Fig. S9** Mass spectrum of **K[L<sub>1</sub>H-HSO<sub>4</sub>]**
10. **Fig. S10** Mass spectrum of **K[L<sub>2</sub>H-HSO<sub>4</sub>]**
11. **Fig. S11** IR spectrum of **K[L<sub>1</sub>H-HSO<sub>4</sub>]**
12. **Fig. S12** IR spectrum of **K[L<sub>2</sub>H-HSO<sub>4</sub>]**
13. **Fig. S13** <sup>1</sup>Hnmr titration of **L<sub>1</sub>H** and Table **S1**
14. **Fig. S14** <sup>1</sup>Hnmr titration of **L<sub>2</sub>H** and Table **S2**
15. **Fig. S15** Absorption and emission spectra of 25 μM of the **L<sub>1</sub>H** and **L<sub>2</sub>H** in 100 mM HEPES buffer (ethanol/water 1:5, v/v) at 25°C
16. **Fig. S16** Fluorescence colour of the **L<sub>1</sub>H** and **L<sub>2</sub>H** in absence and presence of HSO<sub>4</sub><sup>-</sup> ion
17. **Fig. S17** Ratiometric signaling of fluorescence output

18. **Fig. S18** Computational study of probe **L<sub>1</sub>H** and its adduct with **HSO<sub>4</sub><sup>-</sup>**
19. **Fig. S19** Computational study of probe **L<sub>2</sub>H** and its adduct with **HSO<sub>4</sub><sup>-</sup>**
20. **Fig. S20** Fluorescence intensity of **L<sub>1</sub>H** in presence of different anions
21. **Fig. S21** Fluorescence intensity of **L<sub>2</sub>H** in presence of different anions
22. **Fig. S22** Change of relative fluorescence intensity profile of **L<sub>1</sub>H** in presence of different anions
23. **Fig. S23** Change of relative fluorescence intensity profile of **L<sub>2</sub>H** in presence of different anions
24. Table **S3** Life time details of **L<sub>1</sub>H**
25. Table **S4** Life time details of **L<sub>2</sub>H**

## Materials and Instruments

All of the solvents were of analytical grade. The elemental analyses (C, H and N) were performed on a Perkin Elmer 2400 CHN elemental analyzer. A Shimadzu (model UV-1800) spectrophotometer was used for recording electronic spectra. IR spectra were recorded using Prestige-21 SHIMADZU FTIR spectrometer preparing KBr disk. <sup>1</sup>H NMR spectrum of organic moiety was obtained on a Bruker Avance DPX 300 spectrometer using DMSO-d<sub>6</sub> solution. Electrospray ionization (ESI) mass spectra were recorded on a Qtof Micro YA263 mass spectrometer. A Systronics digital pH meter (model 335) was used to measure the pH of the solution and the adjustment of pH was done using either 50 mM HCl or KOH solution. Steady-state fluorescence emission and excitation spectra were recorded with a Hitachi-4500 spectrofluorimeter. Time-resolved fluorescence lifetime measurements were performed using a HORIBA JOBIN Yvon picosecond pulsed diode laser-based time-correlated single-photon counting (TCSPC) spectrometer from IBH (UK) at  $\lambda_{\text{ex}} = 370$  nm and MCP-PMT as a detector. Emission from the sample was collected at a right angle to the direction of the excitation beam maintaining magic angle polarization (54.71°). The full width at half-maximum (FWHM) of the instrument response function was 250 ps, and the resolution was 28.6 ps per channel. Data were fitted to multi exponential functions after de convolution of the instrument response function by an iterative re convolution technique using IBH DAS 6.2 data analysis software in which reduced  $\chi^2$  and weighted residuals serve as parameters for goodness of fit.

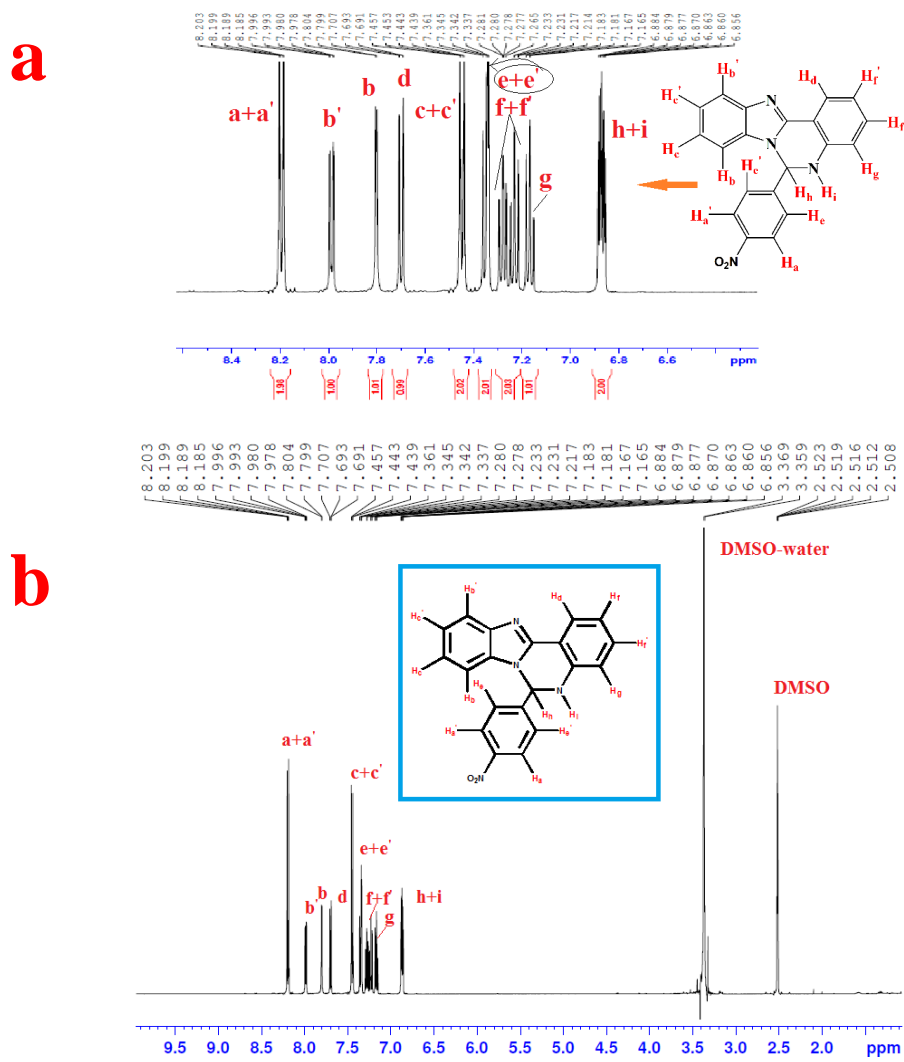

**Fig. S1 a) Expansion of aromatic region b)  $^1\text{H}$ NMR of  $\text{L}_1\text{H}$**

**a**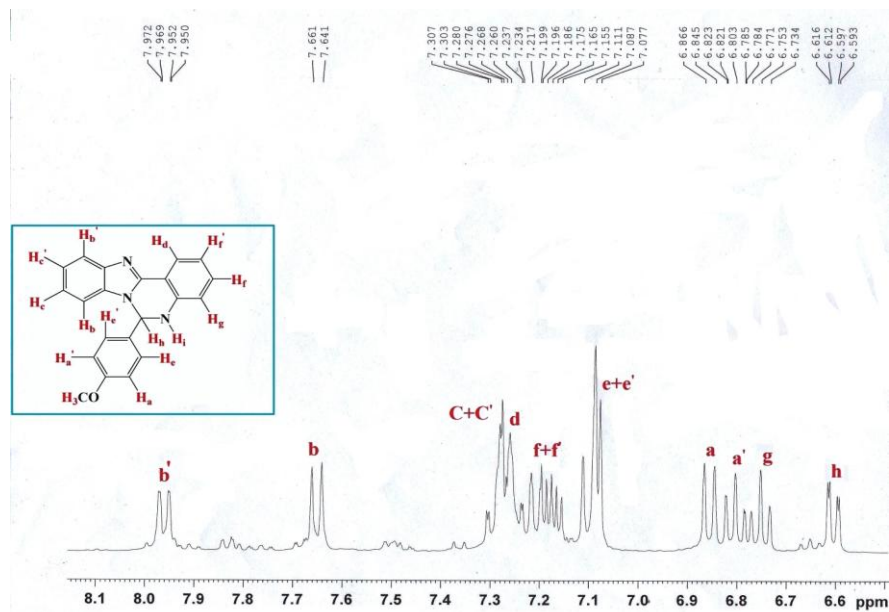**b**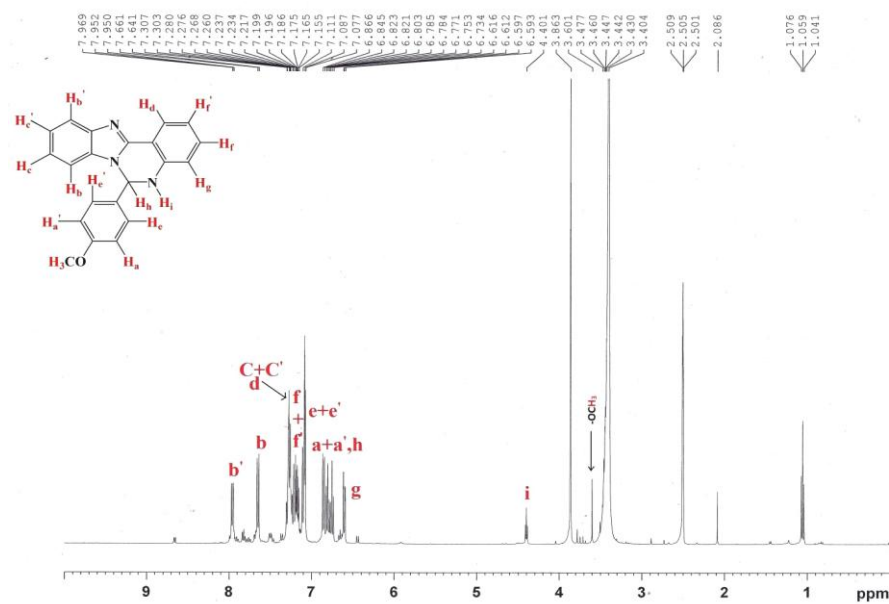

Fig. S2 a) Expansion of aromatic region b)  $^1H$ NMR of  $L_2H$

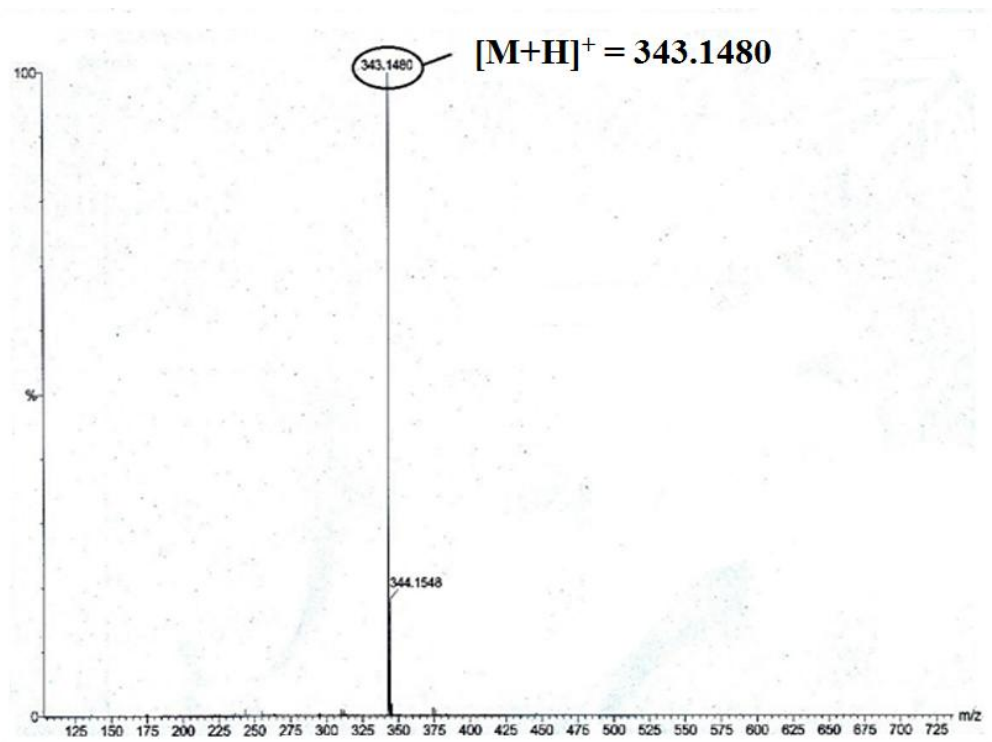

**Fig. S3.** Mass spectrum of  $L_1H$

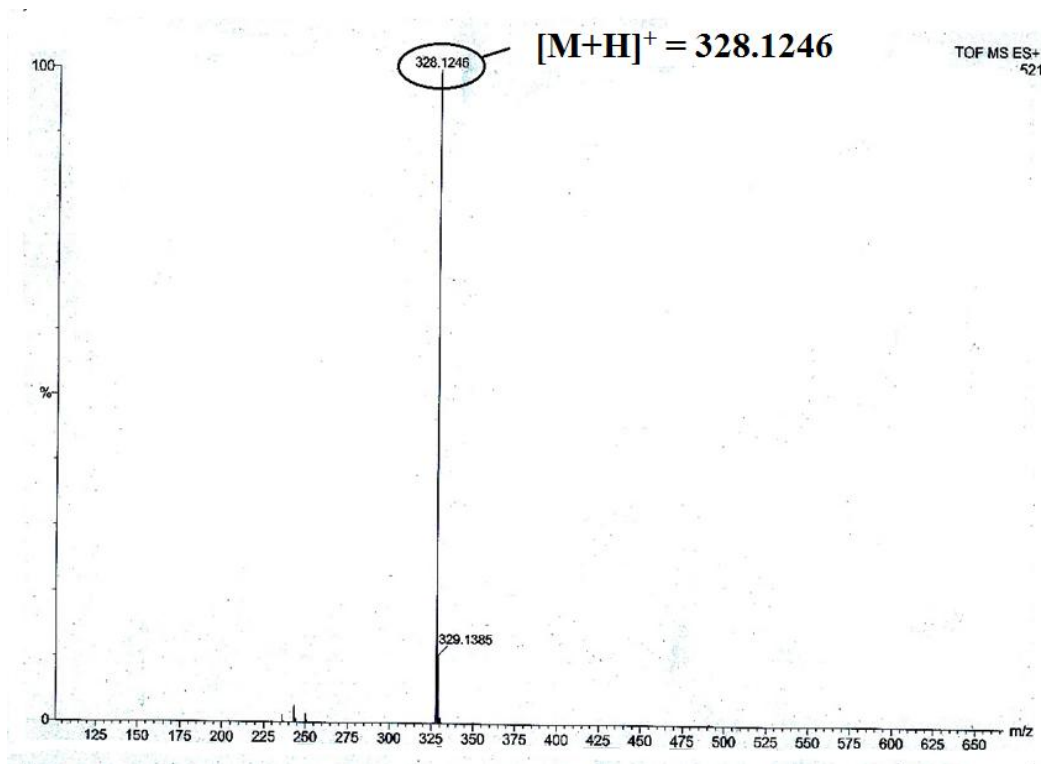

**Fig. S4** Mass spectrum of  $L_2H$

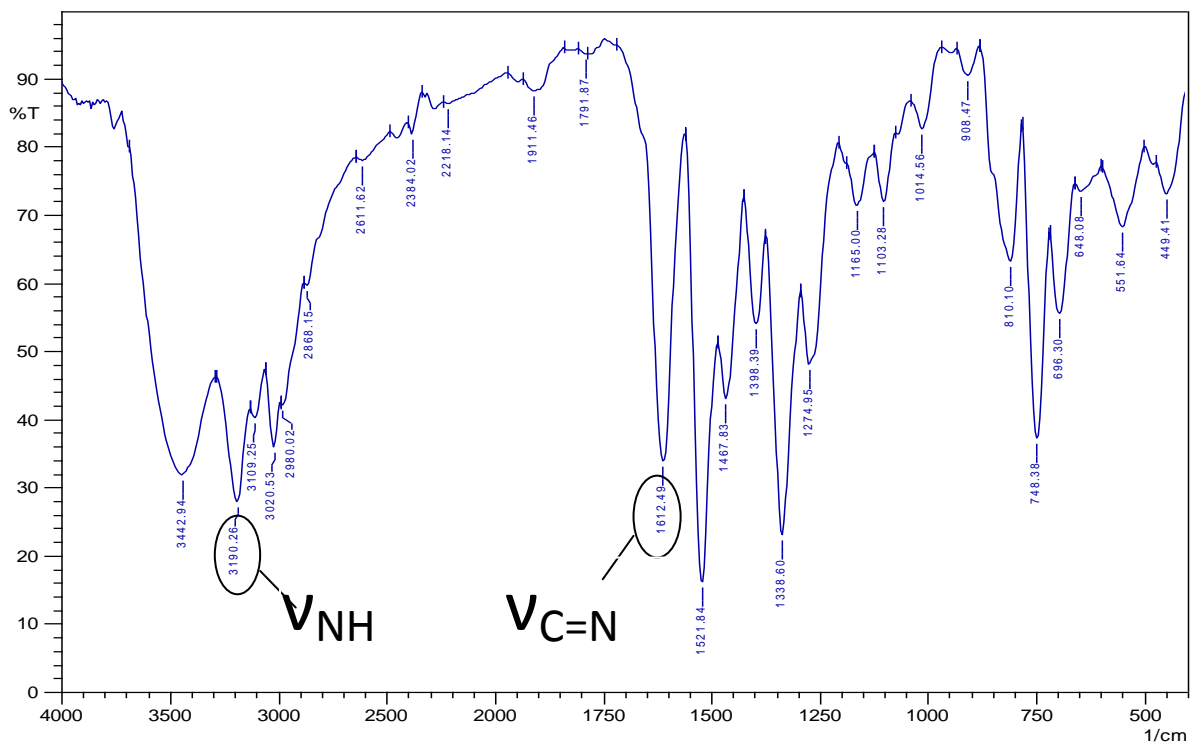

Fig. S5 IR spectrum of **L<sub>1</sub>H**

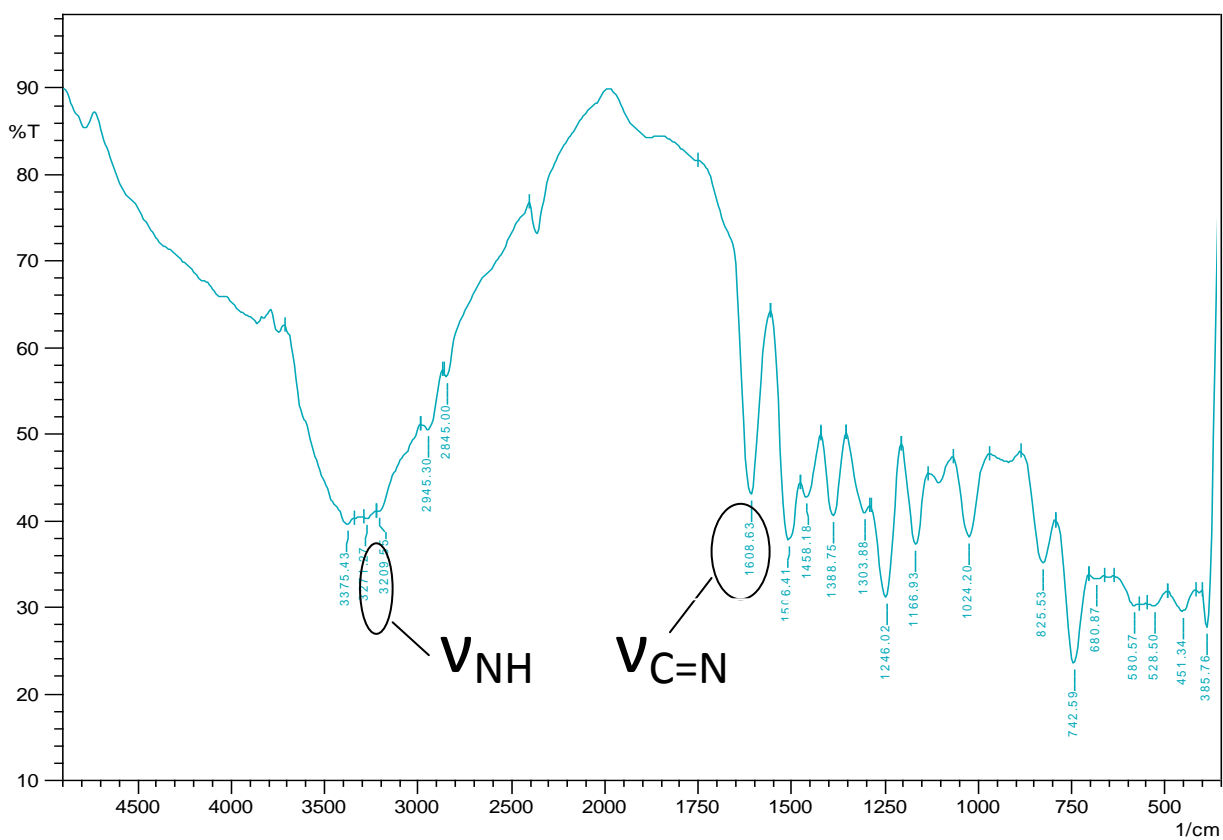

Fig. S6 IR spectrum of **L<sub>2</sub>H**

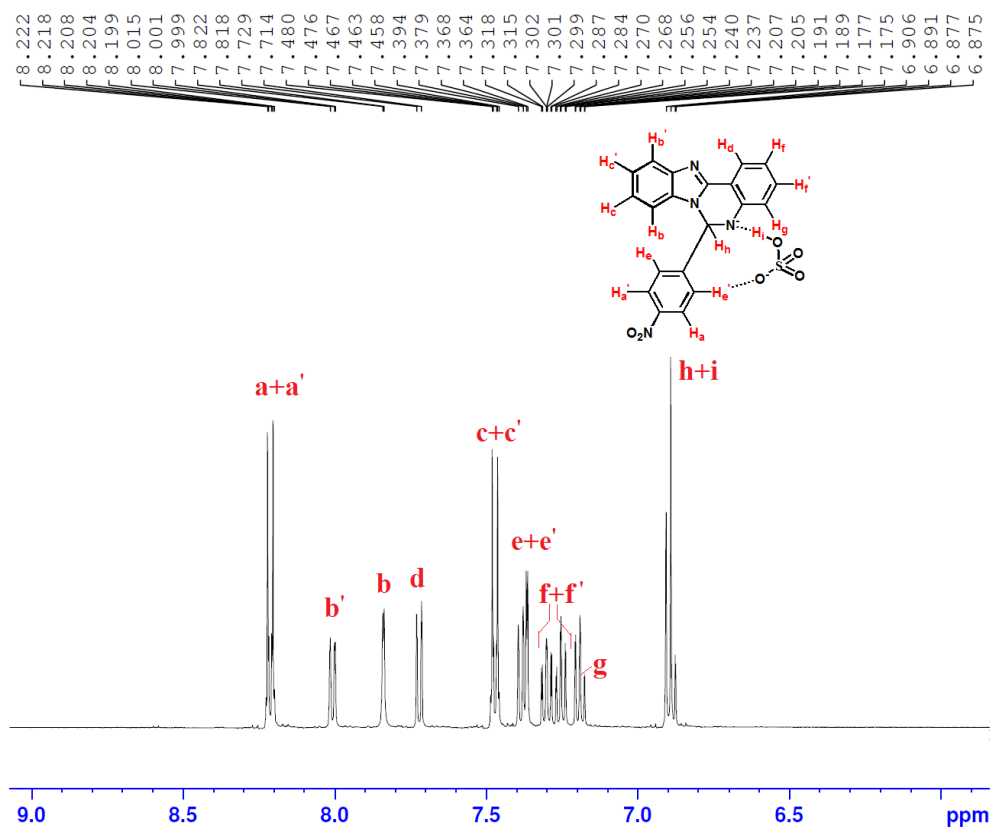

Fig. S7  $^1\text{H}$ NMR expansion of  $\text{K}[\text{L}_1\text{H-HSO}_4]$

a)

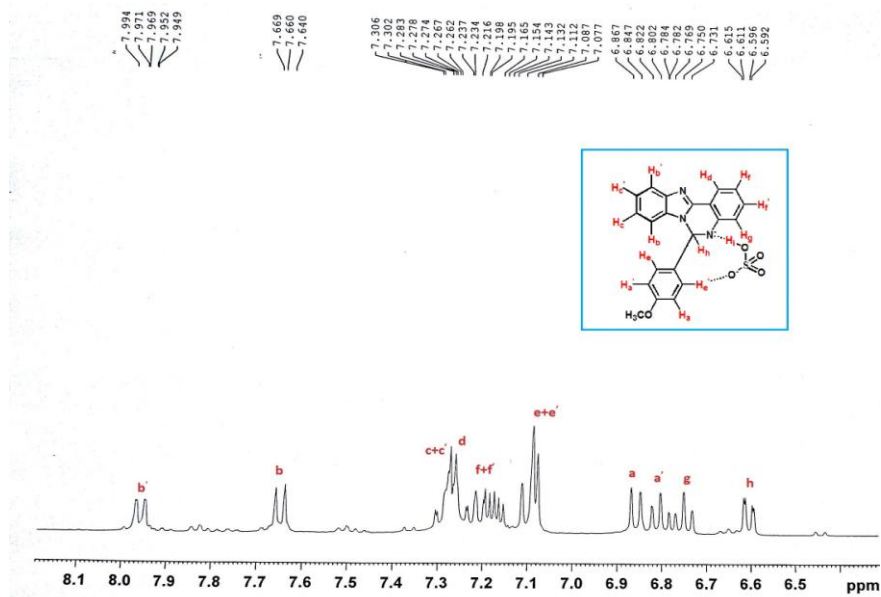

b)

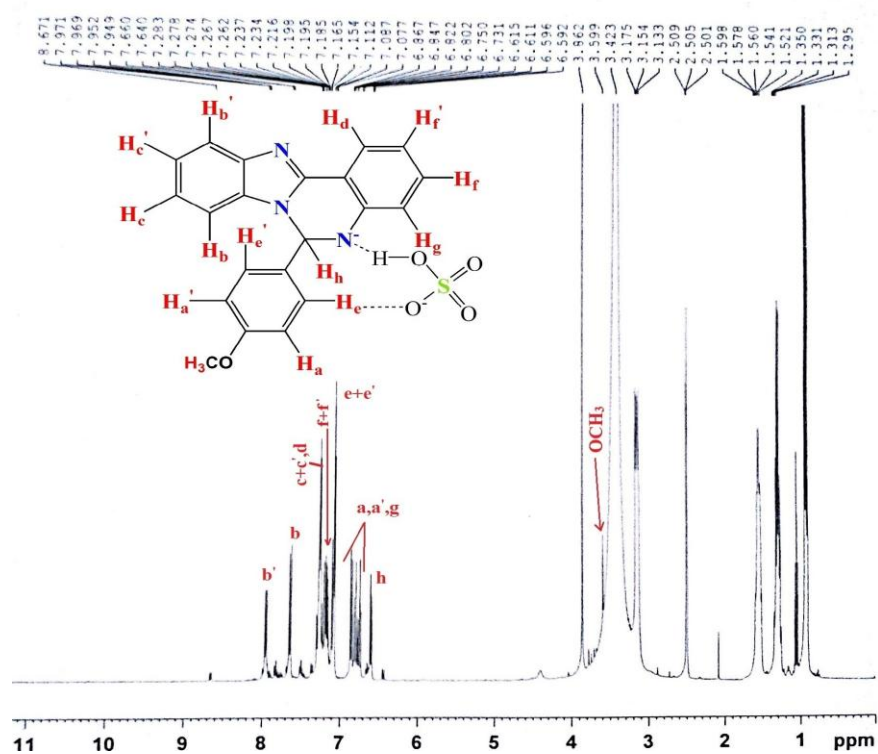

Fig. S8 a) Expansion of aromatic region b)  $^1\text{H}$ NMR of  $\text{K}[\text{L}_2\text{H-HSO}_4]$



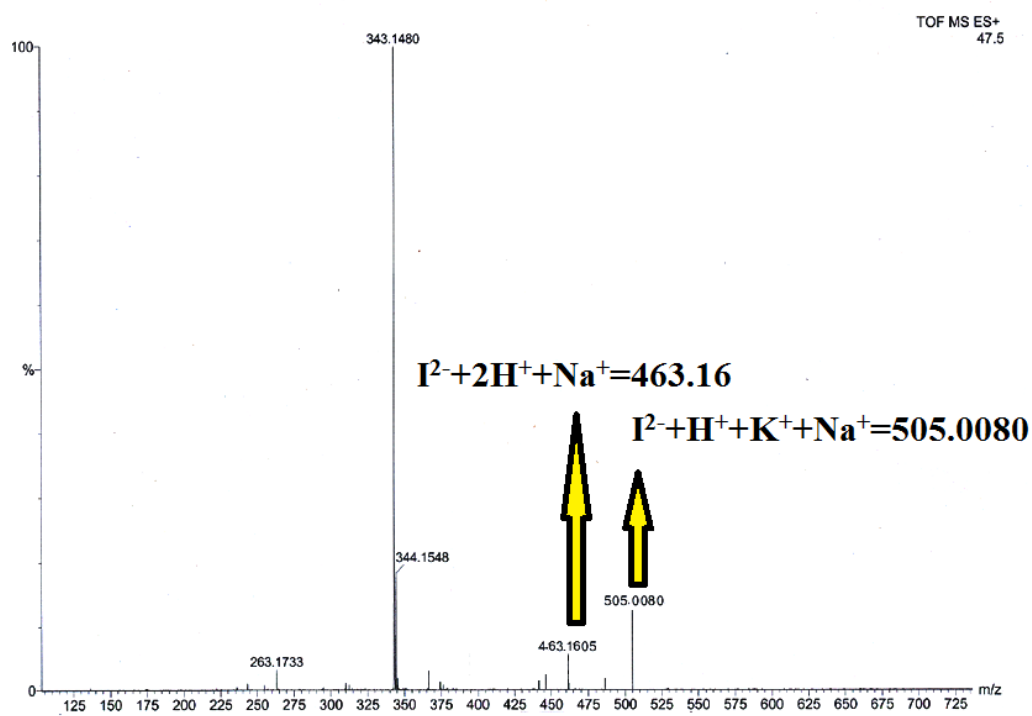

**Fig. S9** Mass spectrum of  $K[L_1H-HSO_4]$

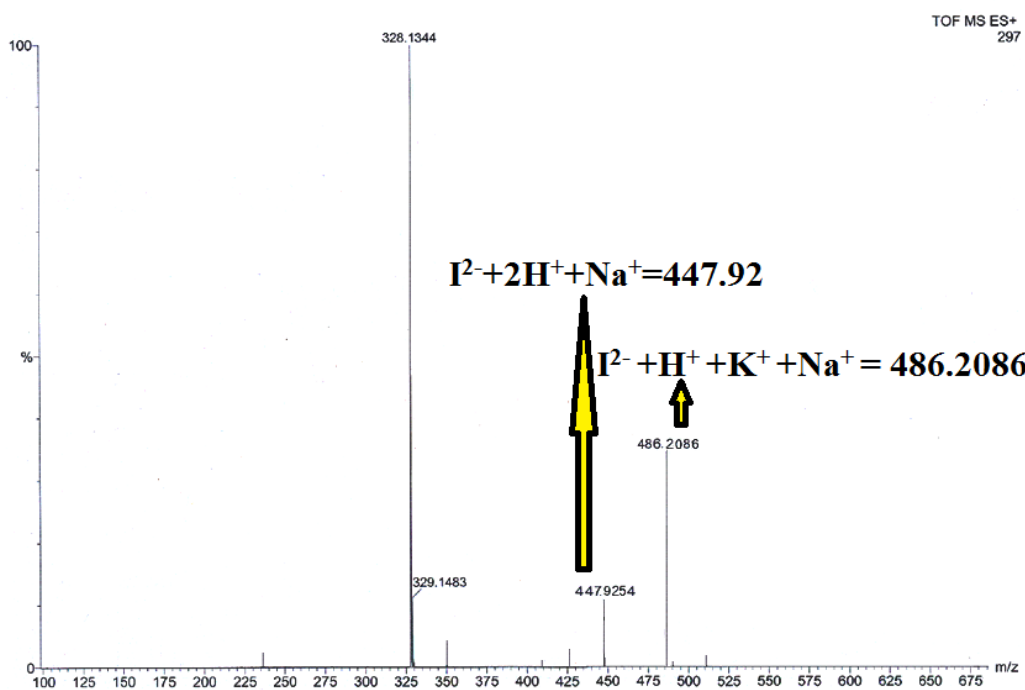

**Fig. S10** Mass spectrum of  $K[L_2H-HSO_4]$

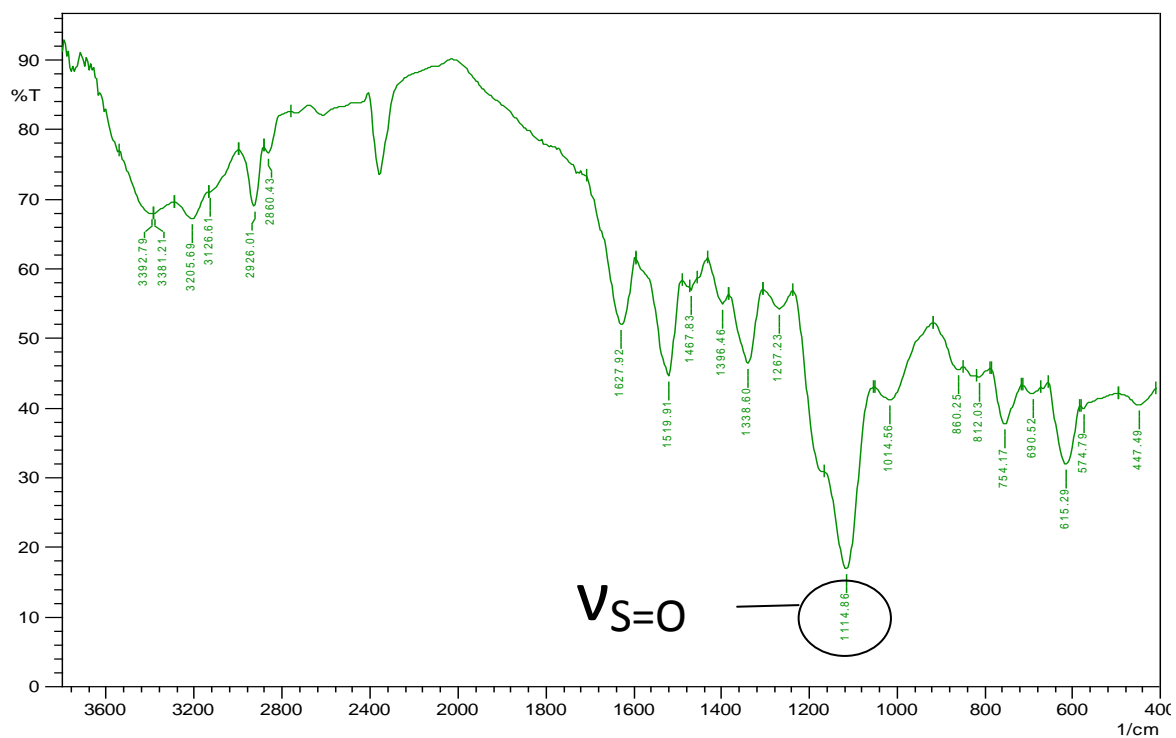

**Fig. S11** IR spectrum of  $K[L_1H-HSO_4]$

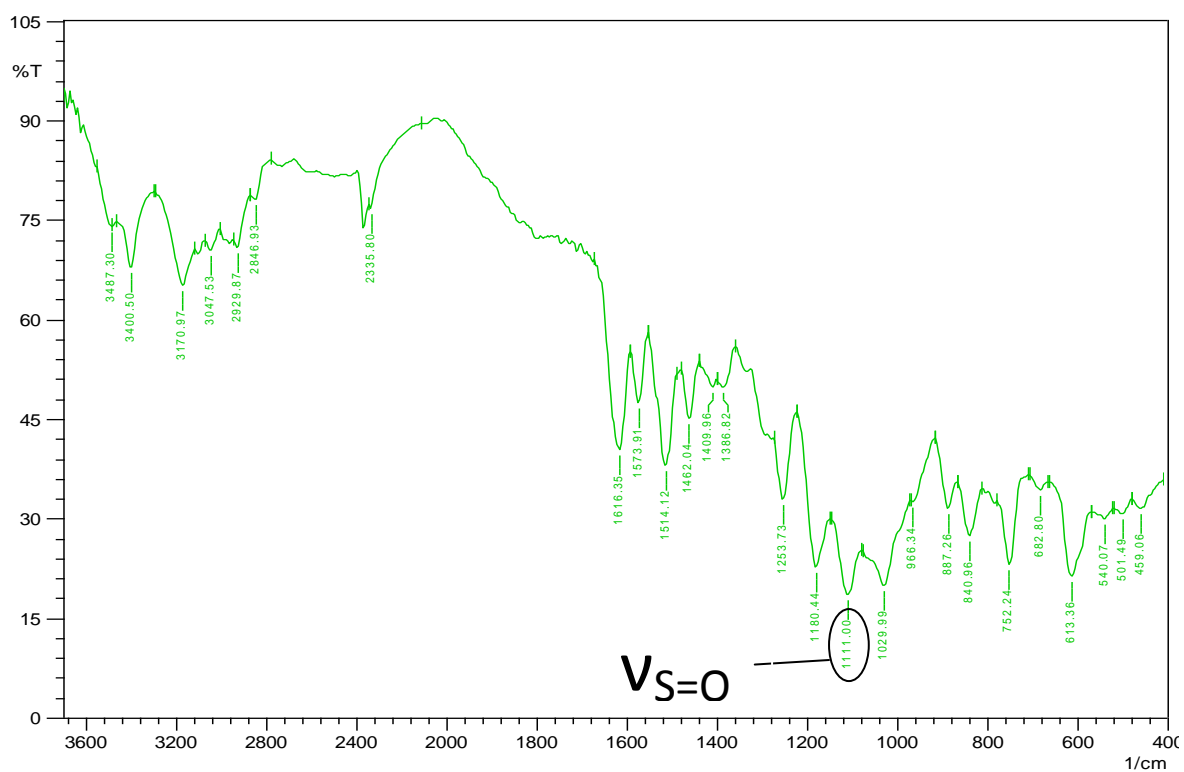

**Fig. S12** IR spectrum of  $K[L_2H-HSO_4]$

**Table S1.**  $^1\text{H}$ nmr titration data of  $\text{L}_1\text{H}$ 

|                                    | $\text{H}_a, \text{H}_{a'}$<br>(2H,d-d) | $\text{H}_{b'}$<br>(1H,d-d) | $\text{H}_b$<br>(1H,d) | $\text{H}_d$<br>(1H,d-d) | $\text{H}_c, \text{H}_{c'}$<br>(2H,m) | $\text{H}_e, \text{H}_{e'}$<br>(2H,m) | $\text{H}_f, \text{H}_f', \text{H}_g$<br>(3H,m) | $\text{H}_h, \text{H}_i$<br>(2H,m)                                  |
|------------------------------------|-----------------------------------------|-----------------------------|------------------------|--------------------------|---------------------------------------|---------------------------------------|-------------------------------------------------|---------------------------------------------------------------------|
| $\text{L}_1\text{H}$               | 8.194                                   | 7.986                       | 7.801                  | 7.704                    | 7.457-<br>7.439                       | <b>7.361,7.345</b><br>7.342,7.337     | 7.281-<br>7.165                                 | 6.884,6.879,<br>6.877,6.870,<br><b>6.863,6.860,</b><br><b>6.856</b> |
| $\text{L}_1^-$<br>$\text{HSO}_4^-$ | 8.213                                   | 8.007                       | 7.82                   | 7.720                    | 7.480-<br>7.458                       | <b>7.394,7.39</b><br>7.368,7.364      | 7.318-<br>7.170                                 | 6.906,6.891,<br>6.877,6.875                                         |

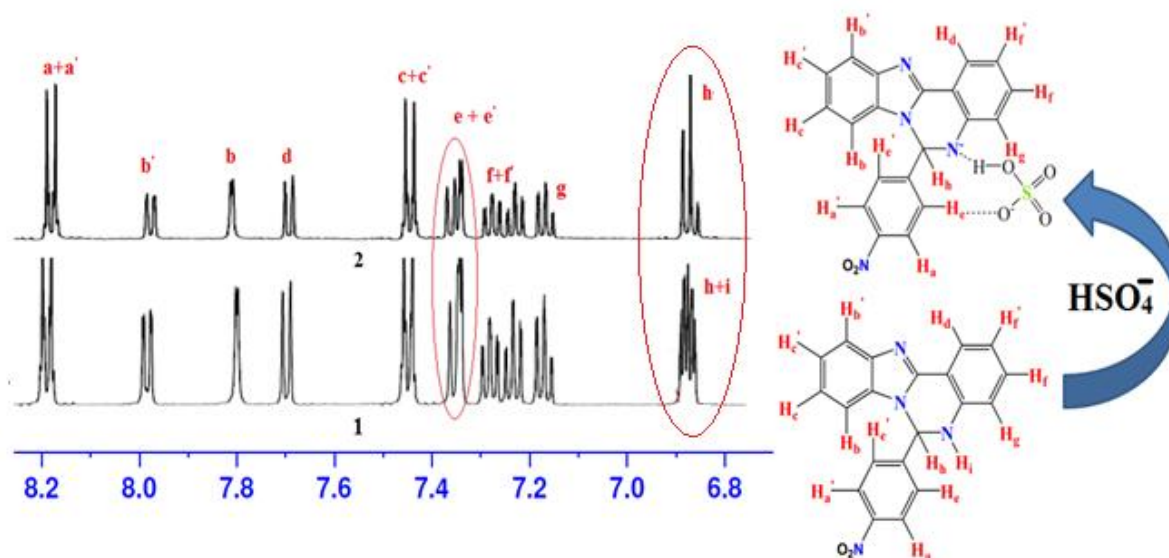**Fig. S13**  $^1\text{H}$ NMR titration of  $\text{L}_1\text{H}$ **Table S2.**  $^1\text{H}$ NMR titration data of  $\text{L}_2\text{H}$ 

|                                   | $\text{H}_{b'}$<br>(1H,d-d) | $\text{H}_b$<br>(1H,d) | $\text{H}_d, \text{H}_c, \text{H}_{c'}$ ,<br>$\text{H}_e, \text{H}_{e'}, \text{H}_f,$<br>$\text{H}_f'$ (7H,m) | $\text{H}_a, \text{H}_{a'}, \text{H}_g$<br>(3H,m) | $\text{H}_h$<br>(1H,d-d) | $\text{H}_i$<br>(1H,s) | $-\text{OCH}_3$<br>(3H,s) |
|-----------------------------------|-----------------------------|------------------------|---------------------------------------------------------------------------------------------------------------|---------------------------------------------------|--------------------------|------------------------|---------------------------|
| $\text{L}_2\text{H}$              | 7.96                        | 7.651                  | 7.307-<br>7.077                                                                                               | 6.866-<br>6.734                                   | 6.604                    | <b>4.401</b>           | 3.601                     |
| $\text{L}_2^-$ - $\text{HSO}_4^-$ | 7.9605                      | 7.645                  | 7.306-<br>7.077                                                                                               | 6.867-<br>6.731                                   | 6.594                    | -                      | 3.601                     |

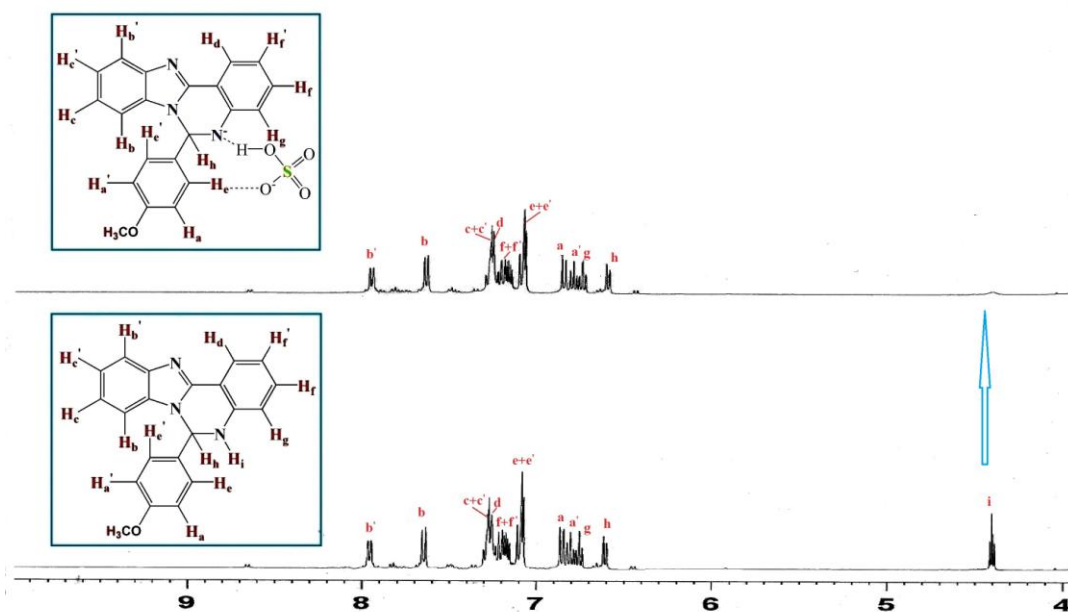

Fig. S14  $^1\text{H}$ NMR titration of  $\text{L}_2\text{H}$

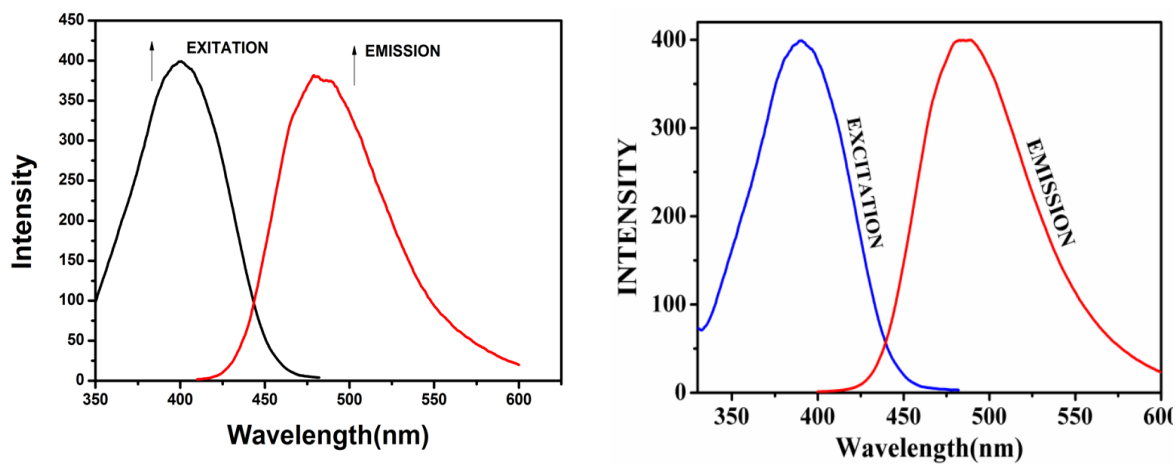

Fig. S15 Absorption and emission spectra of 25  $\mu\text{M}$  of the  $\text{L}_1\text{H}$  (left) and  $\text{L}_2\text{H}$  (right) in 100 mM HEPES buffer (ethanol/water 1:5, v/v) at 25°C

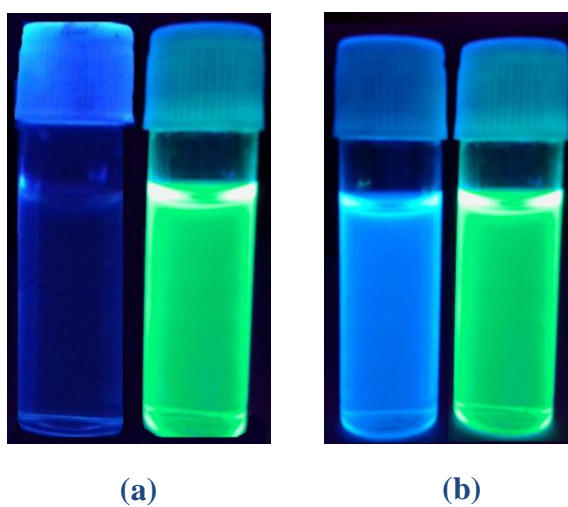

**Fig. S16** (a).Fluorescence colour of the  $L_1H$  in absence (left) and presence(right) of  $HSO_4^-$  ion. (b). Fluorescence colour of the  $L_2H$  in absence (left) and presence(right) of  $HSO_4^-$  ion.

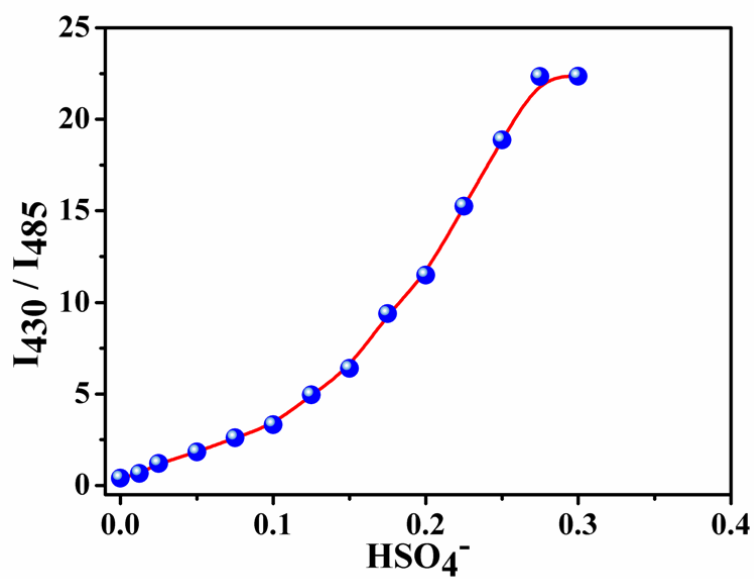

**Fig. S17** Ratiometric signalling output of  $L_2H$

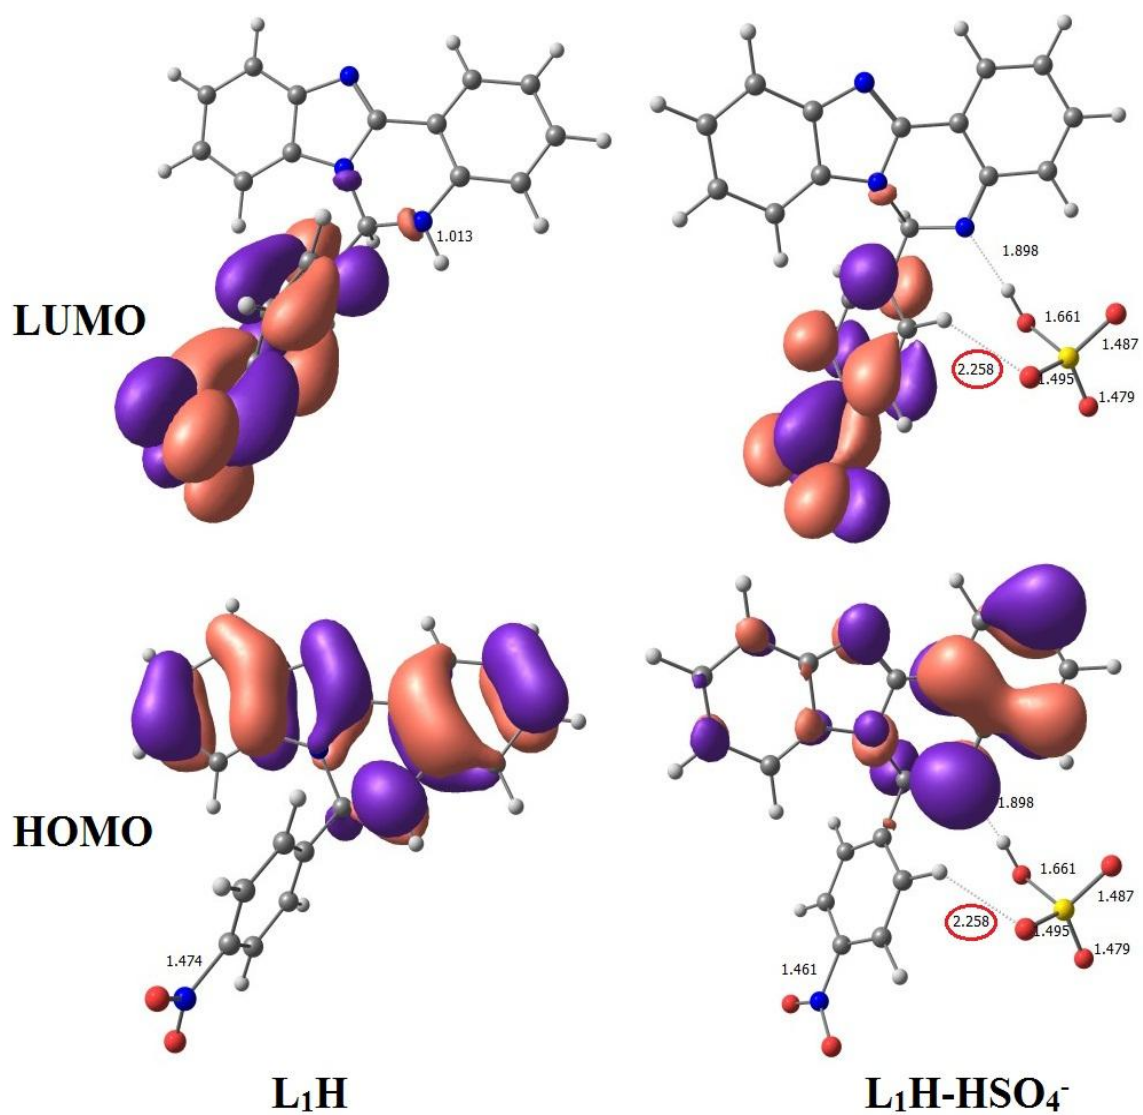

**Fig. S18** Computational study of probe  $L_1H$  and it's adduct with  $HSO_4^-$

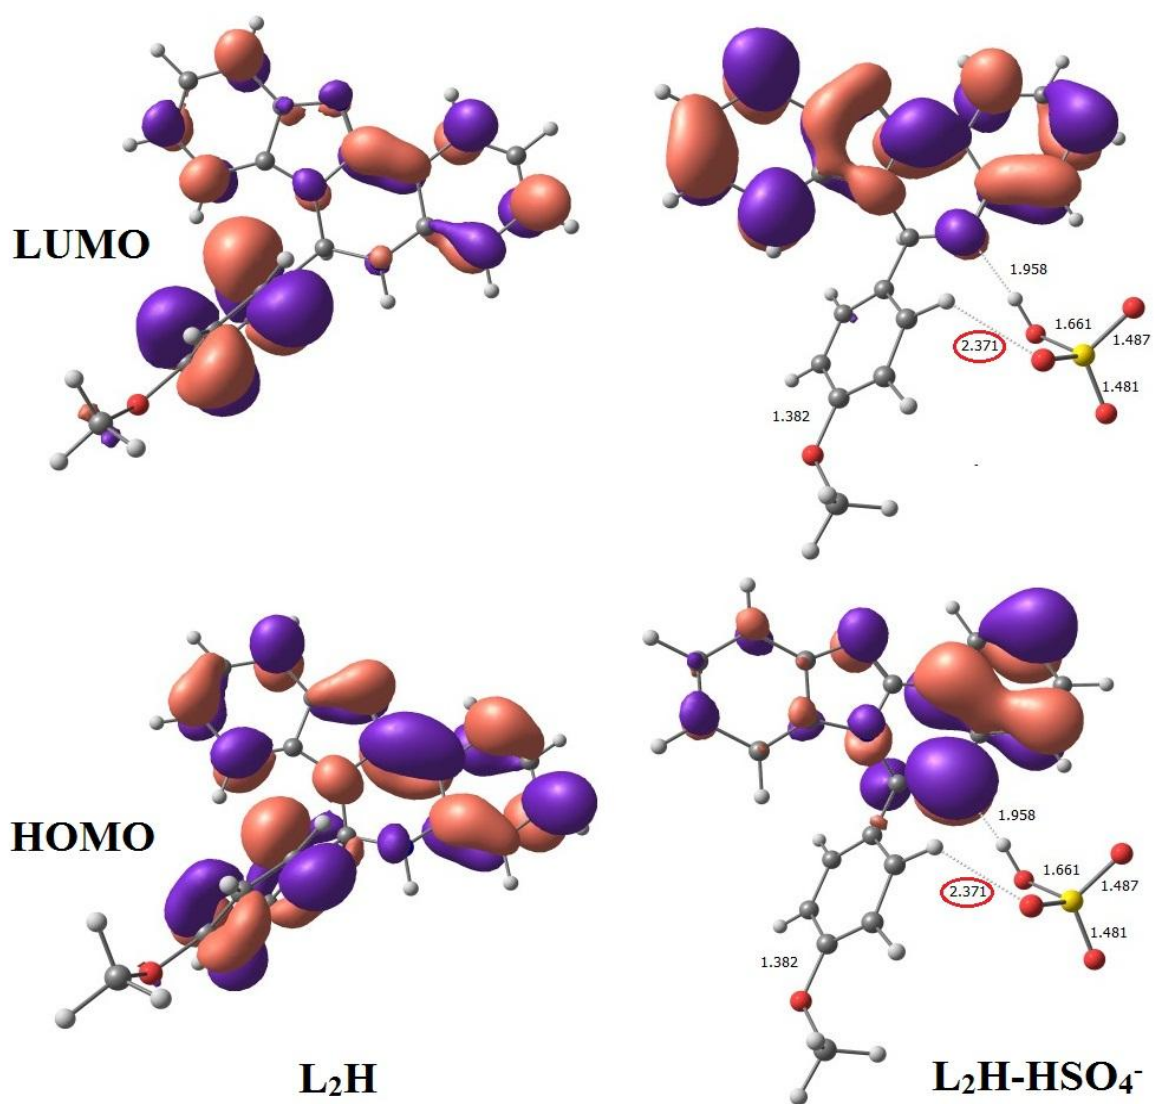

**Fig. S19** Computational study of probe **L<sub>2</sub>H** and it's adduct with **HSO<sub>4</sub><sup>-</sup>**

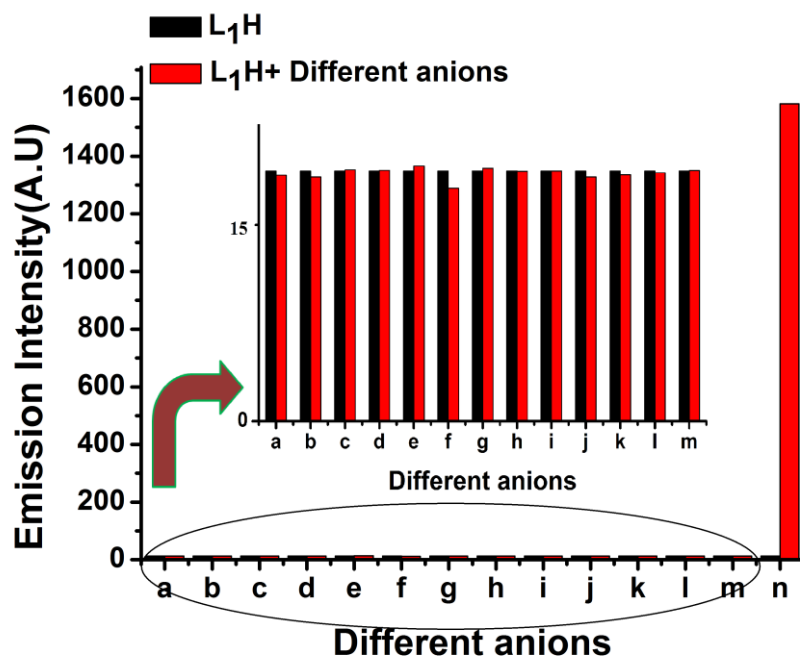

**Fig. S20.** Fluorescence intensity of **L<sub>1</sub>H** in presence of different anions in HEPES buffer (100 mM, pH 7.4; ethanol/water: 1/5, v/v) at 25 °C, (a) OAc<sup>-</sup>, (b) F<sup>-</sup>, (c) I<sup>-</sup>, (d) H<sub>2</sub>PO<sub>4</sub><sup>-</sup>, (e) ClO<sub>4</sub><sup>-</sup>, (f) N<sub>3</sub><sup>-</sup>, (g) Br<sup>-</sup>, (h) H<sub>2</sub>AsO<sub>4</sub><sup>-</sup>, (i) Cl<sup>-</sup>, (j) SO<sub>4</sub><sup>2-</sup>, (k) S<sup>2-</sup>, (l) CN<sup>-</sup>, (m) NO<sub>3</sub><sup>-</sup>, (n) HSO<sub>4</sub><sup>-</sup>

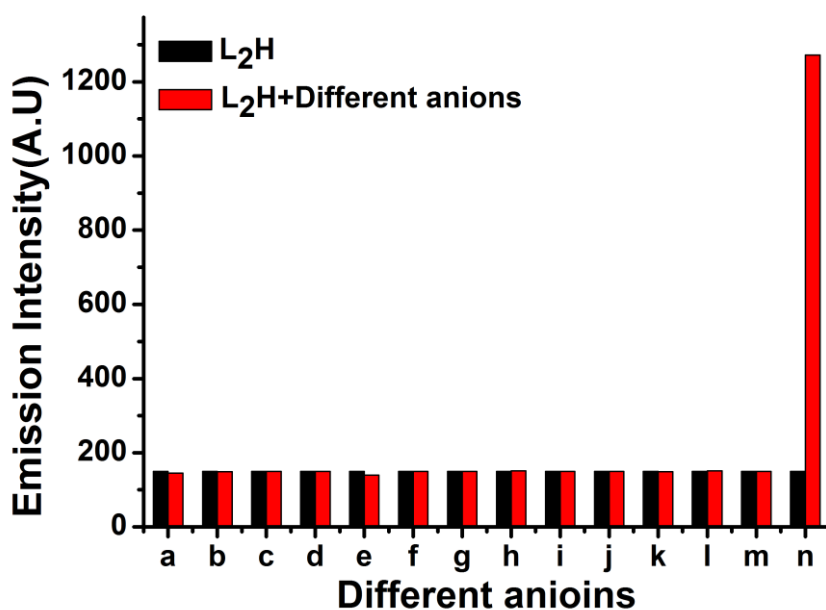

**Fig. S21.** Fluorescence intensity of **L<sub>2</sub>H** in presence of different anions in HEPES buffer (100 mM, pH 7.4; ethanol/water: 1/5, v/v) at 25 °C, (a) Cl<sup>-</sup>, (b) Br<sup>-</sup>, (c) I<sup>-</sup>, (d) F<sup>-</sup>, (e) OAc<sup>-</sup>, (f) H<sub>2</sub>PO<sub>4</sub><sup>-</sup>, (g) N<sub>3</sub><sup>-</sup>, (h) ClO<sub>4</sub><sup>-</sup>, (i) H<sub>2</sub>AsO<sub>4</sub><sup>-</sup>, (j) SO<sub>4</sub><sup>2-</sup>, (k) S<sup>2-</sup>, (l) CN<sup>-</sup>, (m) NO<sub>3</sub><sup>-</sup>, (n) HSO<sub>4</sub><sup>-</sup>



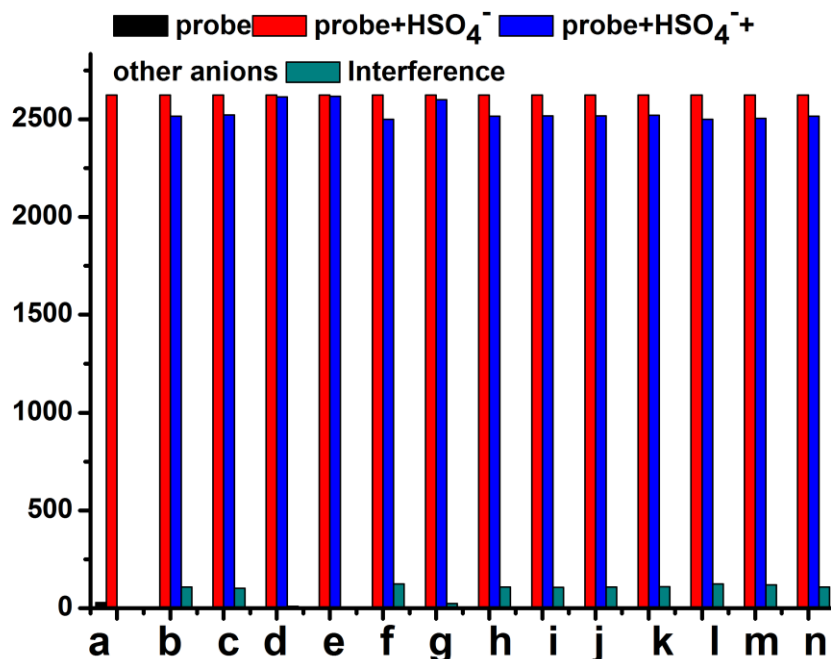

**Fig. S22** Change of relative fluorescence intensity profile of **L<sub>1</sub>H** in presence of different anions in ethanol: water (1: 5, v/v) at room temperature ( $\lambda_{\text{ex}}= 400 \text{ nm}$ ) where (a)  $\text{HSO}_4^-$ , (b)  $\text{OAc}^-$ , (c)  $\text{F}^-$ , (d)  $\text{I}^-$ , (e)  $\text{H}_2\text{PO}_4^-$ , (f)  $\text{ClO}_4^-$ , (g)  $\text{N}_3^-$ , (h)  $\text{Br}^-$ , (i)  $\text{H}_2\text{AsO}_4^-$ , (j)  $\text{NO}_3^-$ , (k)  $\text{SO}_4^{2-}$ , (l)  $\text{S}^{2-}$ , (m)  $\text{CN}^-$

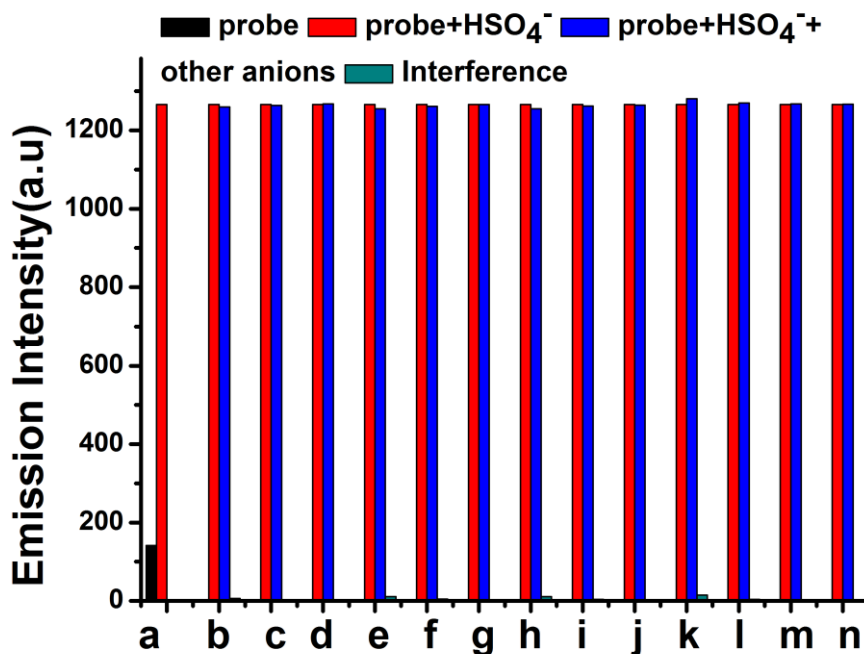

**Fig. S23** Change of relative fluorescence intensity profile of **L<sub>2</sub>H** in presence of different anions in ethanol: water (1: 5, v/v) at room temperature ( $\lambda_{\text{ex}}= 390 \text{ nm}$ ). (a)  $\text{HSO}_4^-$ , (b)  $\text{Cl}^-$ , (c)  $\text{Br}^-$ , (d)  $\text{I}^-$ , (e)  $\text{F}^-$ , (f)  $\text{OAc}^-$ , (g)  $\text{H}_2\text{PO}_4^-$ , (h)  $\text{H}_2\text{AsO}_4^-$ , (i)  $\text{ClO}_4^-$ , (j)  $\text{N}_3^-$ , (k)  $\text{SO}_4^{2-}$ , (l)  $\text{S}^{2-}$ , (m)  $\text{CN}^-$ , (n)  $\text{NO}_3^-$

**Table S3.** Life time detail of **L<sub>1</sub>H**

|                                                              | <b>B<sub>1</sub></b> | <b>B<sub>2</sub></b> | <b>T<sub>1</sub>(ns)</b> | <b>T<sub>2</sub>(ns)</b> | <b>T<sub>av</sub>(ns)</b> | <b>χ<sup>2</sup></b> | <b>φ</b> | <b>K<sub>r</sub></b> | <b>K<sub>nr</sub></b> |
|--------------------------------------------------------------|----------------------|----------------------|--------------------------|--------------------------|---------------------------|----------------------|----------|----------------------|-----------------------|
| <b>(L<sub>1</sub>H)</b>                                      | 5.07                 | 94.93                | 1.74                     | 8.67                     | 8.32                      | 1.082                | 0.0055   | 0.0006<br>6          | 0.119<br>5            |
| <b>L<sub>1</sub>+HSO<sub>4</sub><sup>-</sup><br/>(1:0.5)</b> | 29.28                | 70.72                | 1.93                     | 12.53                    | 9.42                      | 1.028                |          |                      |                       |
| <b>L<sub>1</sub>+HSO<sub>4</sub><sup>-</sup><br/>(1:1)</b>   | 18.98                | 81.02                | 1.86                     | 12.84                    | 10.75                     | 1.064                | 0.355    | 0.033                | 0.06                  |

**Table S4.** Life time detail of **L<sub>2</sub>H**

|                                                              | <b>B<sub>1</sub></b> | <b>B<sub>2</sub></b> | <b>T<sub>1</sub>(ns)</b> | <b>T<sub>2</sub>(ns)</b> | <b>T<sub>av</sub>(ns)</b> | <b>X<sup>2</sup></b> | <b>φ</b> | <b>K<sub>r</sub></b> | <b>K<sub>nr</sub></b> |
|--------------------------------------------------------------|----------------------|----------------------|--------------------------|--------------------------|---------------------------|----------------------|----------|----------------------|-----------------------|
| <b>(L<sub>2</sub>H)</b>                                      | 33.61                | 66.39                | 7.30                     | 10.96                    | 8.26                      | 1.068                | 0.065    | 0.00785              | 0.113                 |
| <b>L<sub>2</sub>+HSO<sub>4</sub><sup>-</sup><br/>(1:0.5)</b> | 14.67                | 85.33                | 6.76                     | 8.89                     | 8.58                      | 1.031                | -        | -                    | -                     |
| <b>L<sub>2</sub>+HSO<sub>4</sub><sup>-</sup><br/>(1:1)</b>   | 6.55                 | 93.45                | 3.65                     | 12.36                    | 11.79                     | 1.078                | 0.48     | 0.04                 | 0.044<br>11           |

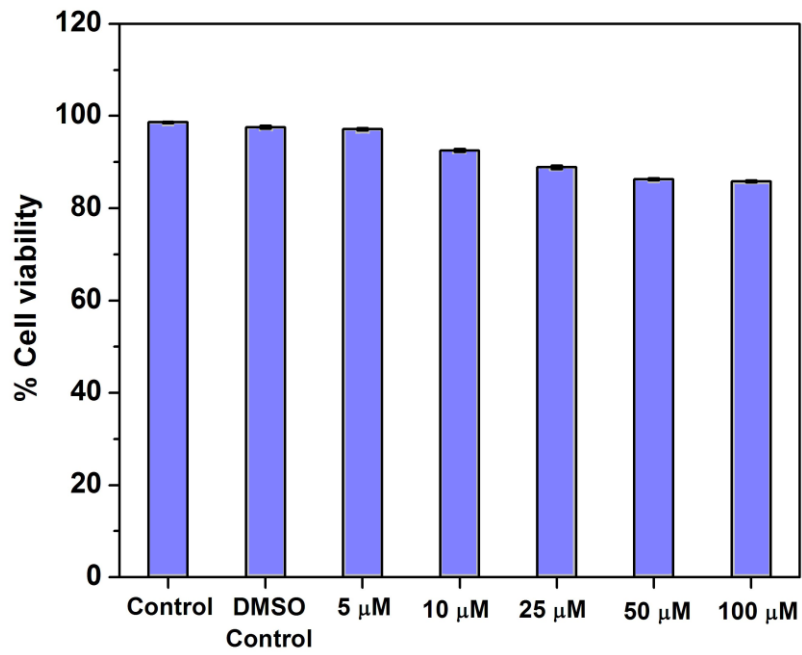

**Fig. S24** Cytotoxic effect of **L<sub>1</sub>H** (5, 10, 25, 50 and 100  $\mu$ M) in HeLa cells incubated for 8 h

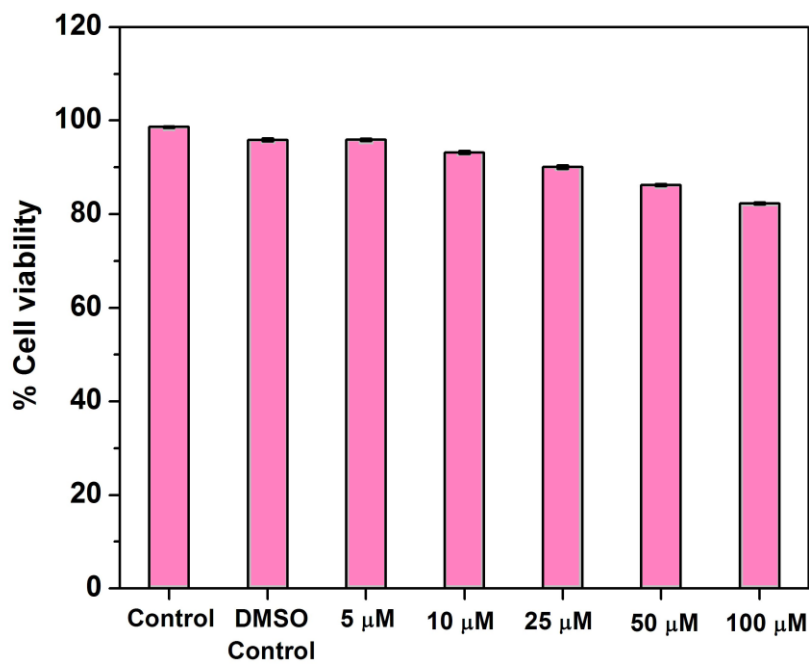

**Fig. S25** Cytotoxic effect of **L<sub>2</sub>H** (5, 10, 25, 50 and 100  $\mu$ M) in HeLa cells incubated for 8 h
